# Supplementary material for: Prevalence and Factors Associated with Irritable Bowel Syndrome among Medical Students in Ethiopia: A Cross-Sectional Study
Source: Research Square preprint supplement (doi:10.21203/rs.3.rs-7401772/v1), 2025-09-30
Supplement: Supplementary file 1 [file d6350726534bcb47bece97e9.docx]

| **University** | **No IBS** | **IBS** |
| --- | --- | --- |
| **Addis Ababa University** | 111 (41.1%) | 9 (45.0%) |
| **Ambo university** | 1 (0.4%) | 0 (0.0%) |
| **Arsi University** | 52 (19.3%) | 3 (15.0%) |
| **Gondar University** | 23 (8.5%) | 1 (5.0%) |
| **Hawassa University** | 4 (1.5%) | 0 (0.0%) |
| **Hayat Medical College** | 45 (16.7%) | 4 (20.0%) |
| **Hayat medical college** | 1 (0.4%) | 0 (0.0%) |
| **Jimma University** | 6 (2.2%) | 3 (15.0%) |
| **mizan tepi** | 1 (0.4%) | 0 (0.0%) |
| **Myungsung Medical College** | 16 (5.9%) | 0 (0.0%) |
| **Sante Medical College** | 9 (3.3%) | 0 (0.0%) |
| **Wachamo University** | 1 (0.4%) | 0 (0.0%) |

Figure 1 Universities the data was collected from divided by IBS status.
